# Supplementary material
Source: publisher figshare collection journal article supplement (https://springernature.figshare.com/ndownloader/files/20373399)
Supplement: Supplementary file 1 [file 20373399]

*Additional file 2 – Statistical significance of One-Way Repeated-Measures ANOVA comparing the distance covered by the cats every hour.*
